# Supplementary material for: A Simple GC-MS/MS Method for Determination of Smoke Taint-Related Volatile Phenols in Grapes
Source: PubMed Central journal article supplement (PMC7407152; doi:10.3390/metabo10070294), 2020-07-17
Supplement: metabolites-10-00294-s001.pdf [file metabolites-10-00294-s001.pdf]

## Supplementary Materials

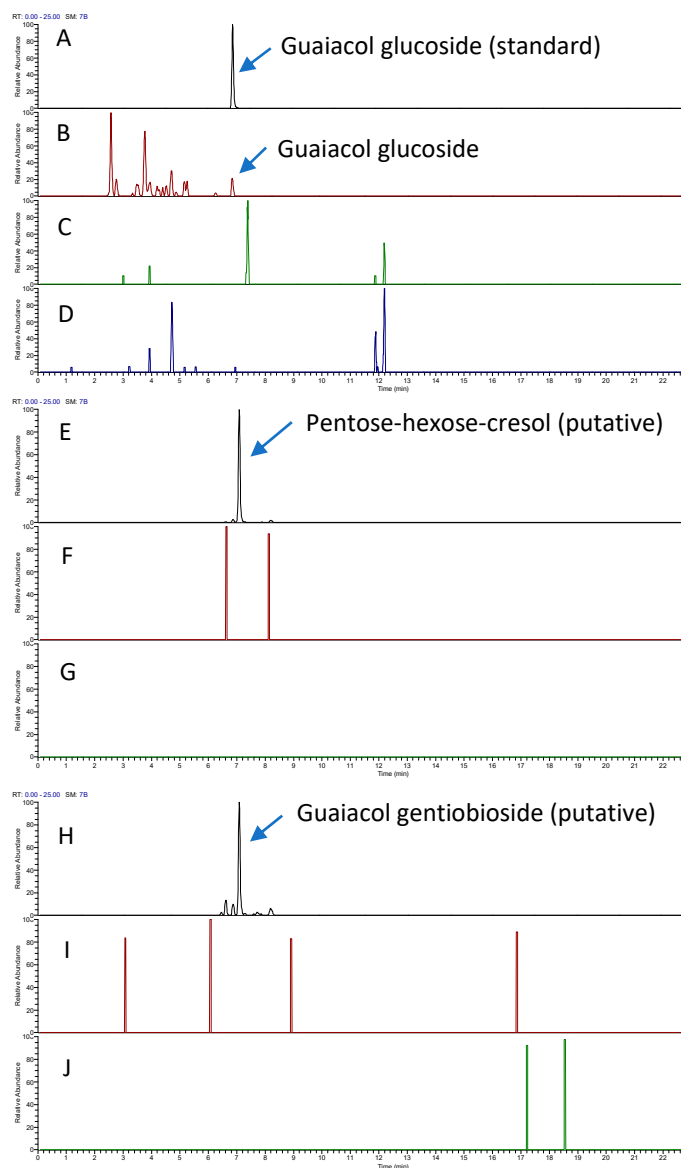

**Figure S-1.** LC-MS profile (extracted ion chromatogram) of guaiacol glucoside (A, B, C & D), pentose-hexose-cresol (E, F & G) and guaiacol gentiobioside (H, I & J) before hydrolysis (B, E & H) and after hydrolysis with 1 N HCl (C, F & I) and 1.25 N H<sub>2</sub>SO<sub>4</sub> (D, G & J). The hydrolysis reaction was conducted at 100 °C for 60 min.

Table S-1: Recovery of free VP compounds from the heated acidic hydrolysis medium

| VPs                       | Recovery (%) |
|---------------------------|--------------|
| Guaiacol                  | 87.4±2.8     |
| 4-methylguaiacol          | 81.8±0.2     |
| Syringol                  | 79.4±2.1     |
| 4-methylsyringol          | 80.3±3.9     |
| o-cresol                  | 87.4±2.1     |
| p-cresol                  | 90.5±1.9     |
| m-cresol                  | 80.5±2.6     |
| Phenol                    | 84.9±8.6     |
| 4-ethylguaiacol           | 92.7±6.9     |
| Eugenol                   | 84.1±0.8     |
| Isoeugenol                | 18.4±4.2     |
| 2,4-dimethylphenol        | 82.7±10.9    |
| 4-ethylphenol             | 84.5±4.0     |
| 4- <i>n</i> -propylphenol | 88.6±13.5    |
| Vanillin                  | 87.4±5.0     |
| Acetovanillone            | 78.0±8.2     |
